# Supplementary material for: AGCPP: All-day Global Cloud Physical Properties dataset with 0.07° resolution retrieved from geostationary satellite imagers covering the period from 2000 to 2022
Source: Copernicus journal article supplement (doi:10.5194/essd-2025-425), 2025-08-19
Supplement: Supplementary file 1 [file essd-2025-425-supplement.pdf]

# AGCPP: All-day Global Cloud Physical Properties dataset with 0.07° resolution retrieved from geostationary satellite imagers covering the period from 2000 to 2022

Lingxiao Zhao<sup>1</sup>, Feng Zhang<sup>1</sup>, Jingwei Li<sup>1</sup>, Feng Lu<sup>2</sup>, and Zhijun Zhao<sup>1</sup>

5 <sup>1</sup>Key Laboratory of Polar Atmosphere-Ocean-Ice System for Weather and Climate of Ministry of Education / Shanghai Key Laboratory of Ocean-Land-Atmosphere Boundary Dynamics and Climate Change, Department of Atmospheric and Oceanic Sciences & Institutes of Atmospheric Sciences, Fudan University, Shanghai, China

<sup>2</sup>CMA Key Laboratory for Cloud Physics, Weather Modification Center, China Meteorological Administration (CMA), Beijing, China

10 *Correspondence to:* Feng Zhang (fengzhang@fudan.edu.cn)

## Contents of this file

Figure S1-S4 to Section 4

## 15 Introduction

This supplementary material, Fig. S 1, Fig. S 2, Fig. S 3, and Fig. S 4 in the article comprise the complete AGCPP DJF, MAM, JJA, and SON seasonal average results for 2020–2022.

20

**Figure S1**

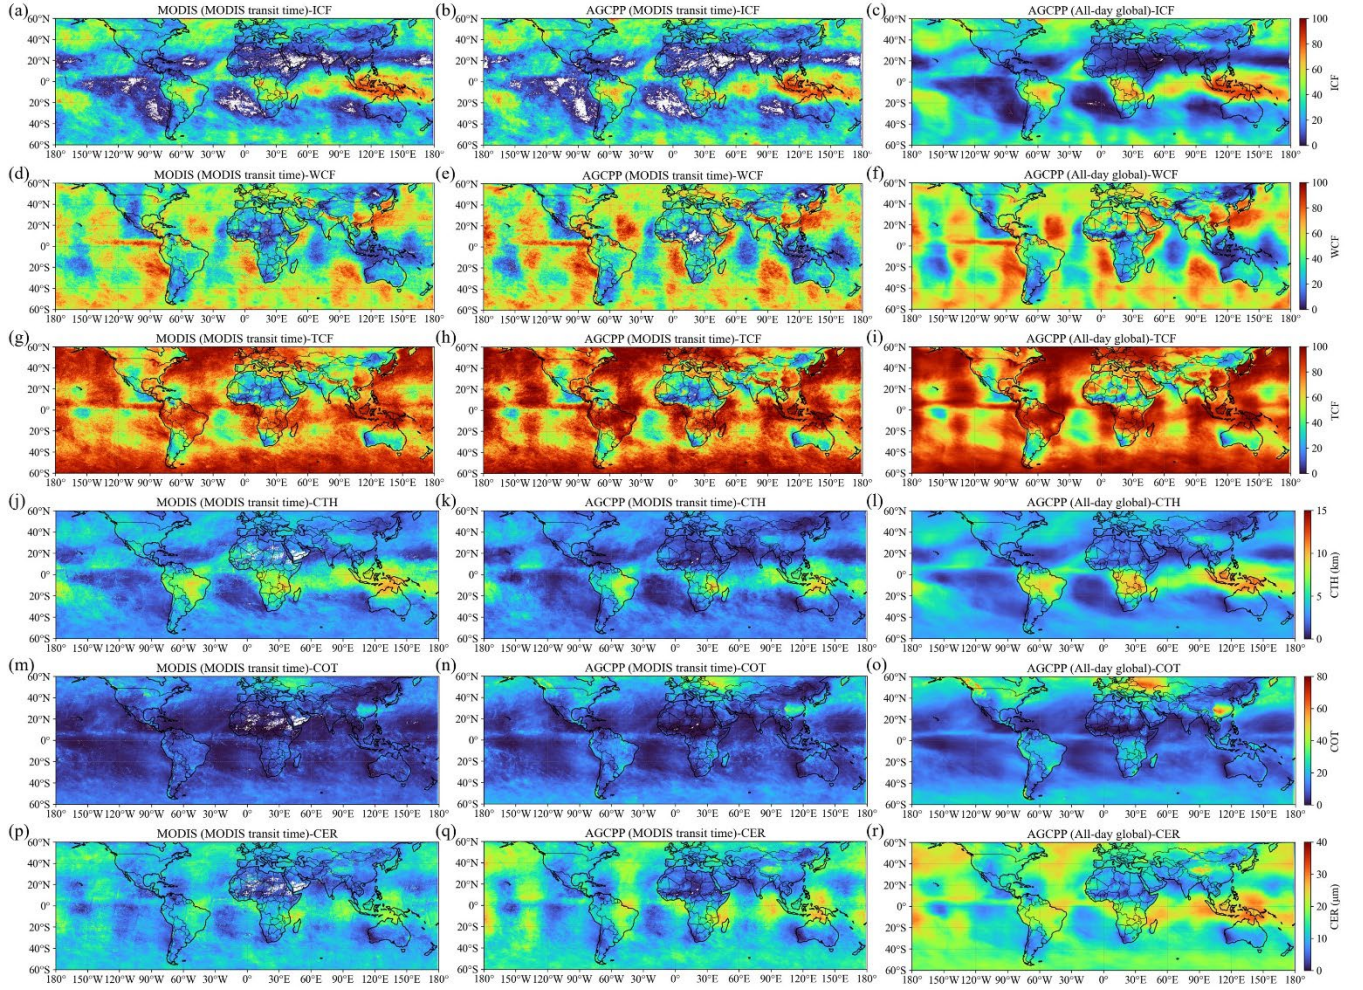

**Figure S 1.** The spatial distribution of global cloud physical products for the DJF season average from 2020 to 2022, respectively: ICF (a–c), WCF (d–f), TCF (g–i), CTH (j–l), COT (m–o), and CER (p–r). Vertically, these are the seasonal averages of the MODIS official cloud products with a 1.5 h transit time interval (a, d, g, j, m, p), the seasonal averages of AGCPP at the same MODIS transit time and coverage location (b, e, h, k, n, q), and the seasonal averages of AGCPP's all -day global products at all times (c, f, i, l, o, r).



**Figure S2**

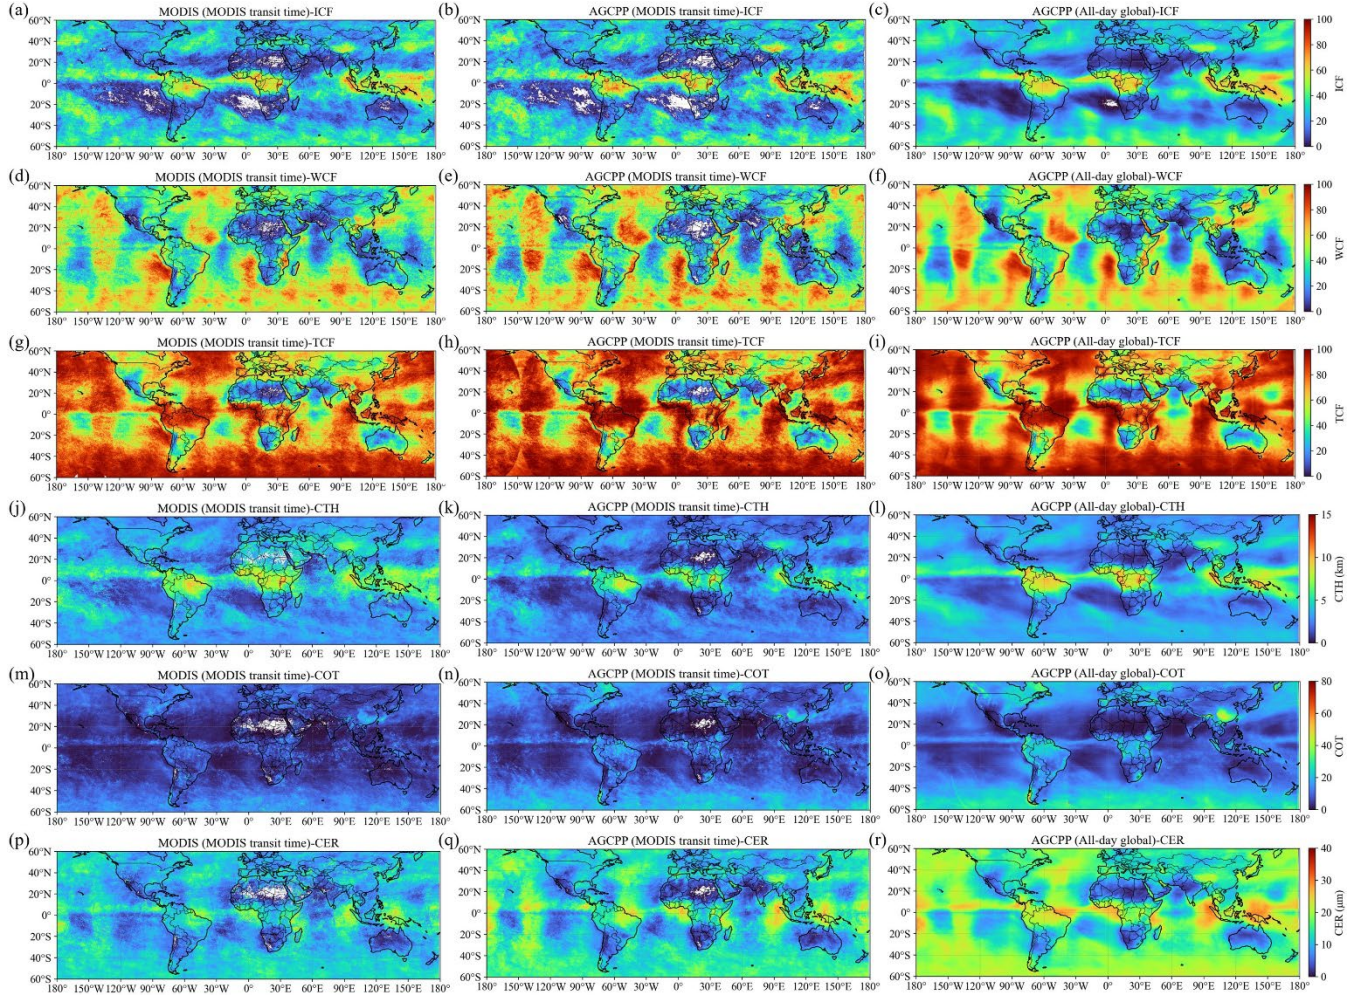

**Figure S 2.** The spatial distribution of global cloud physical products for the MAM season average from 2020 to 2022, respectively: ICF (a–c), WCF (d–f), TCF (g–i), CTH (j–l), COT (m–o), and CER (p–r). Vertically, these are the seasonal averages of the MODIS official cloud products with a 1.5 h transit time interval (a, d, g, j, m, p), the seasonal averages of AGCPP at the same MODIS transit time and coverage location (b, e, h, k, n, q), and the seasonal averages of AGCPP's all -day global products at all times (c, f, i, l, o, r).



**Figure S3**

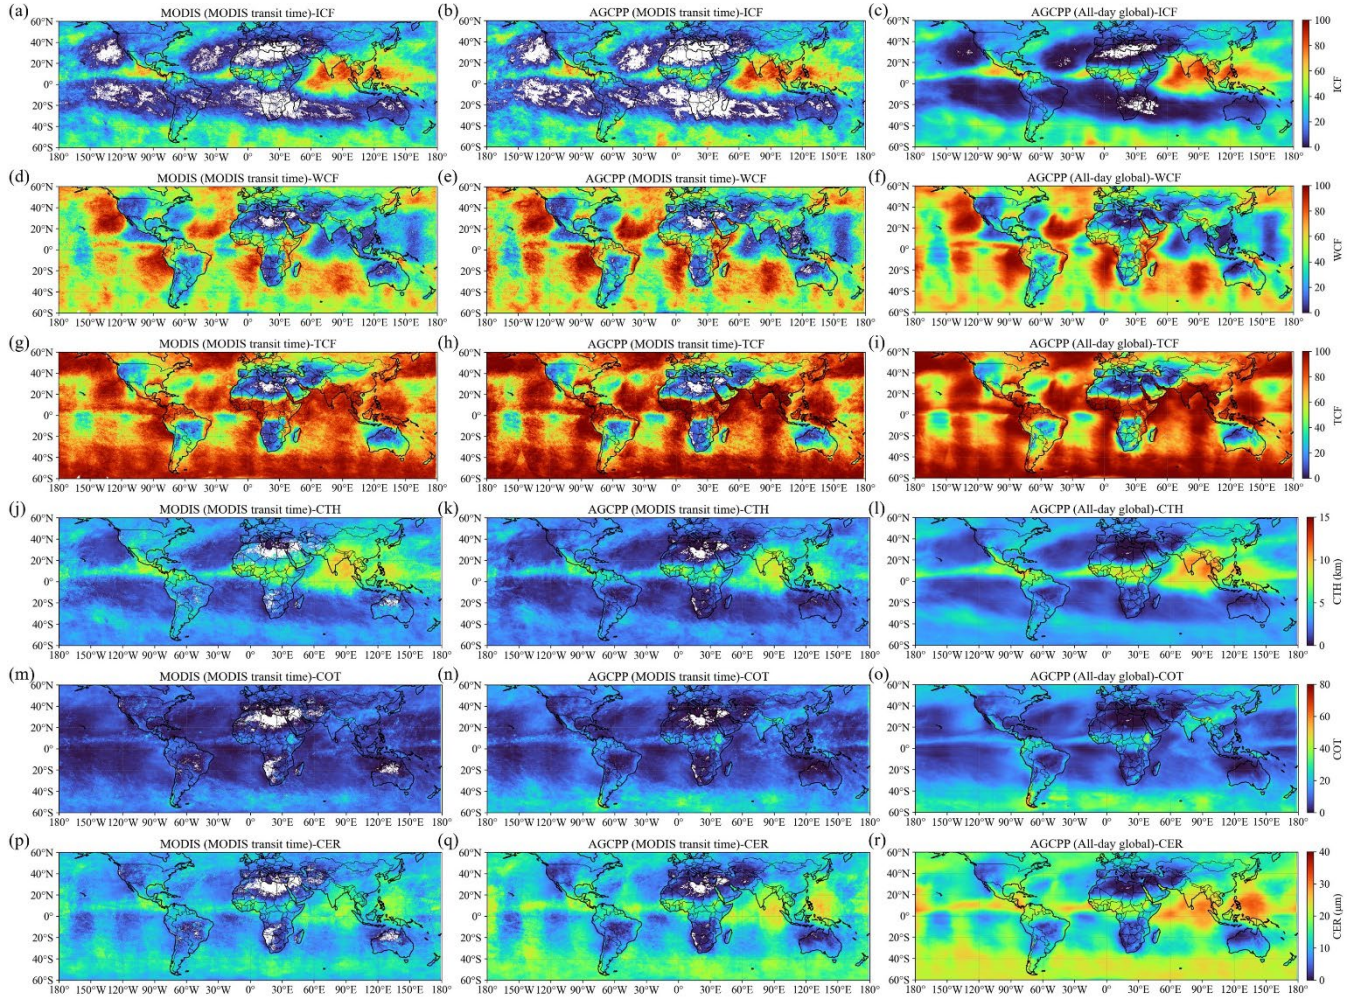

**Figure S 3.** The spatial distribution of global cloud physical products for the JJA season average from 2020 to 2022, respectively: ICF (a–c), WCF (d–f), TCF (g–i), CTH (j–l), COT (m–o), and CER (p–r). Vertically, these are the seasonal averages of the MODIS official cloud products with a 1.5 h transit time interval (a, d, g, j, m, p), the seasonal averages of AGCPP at the same MODIS transit time and coverage location (b, e, h, k, n, q), and the seasonal averages of AGCPP's all -day global products at all times (c, f, i, l, o, r).



**Figure S4**

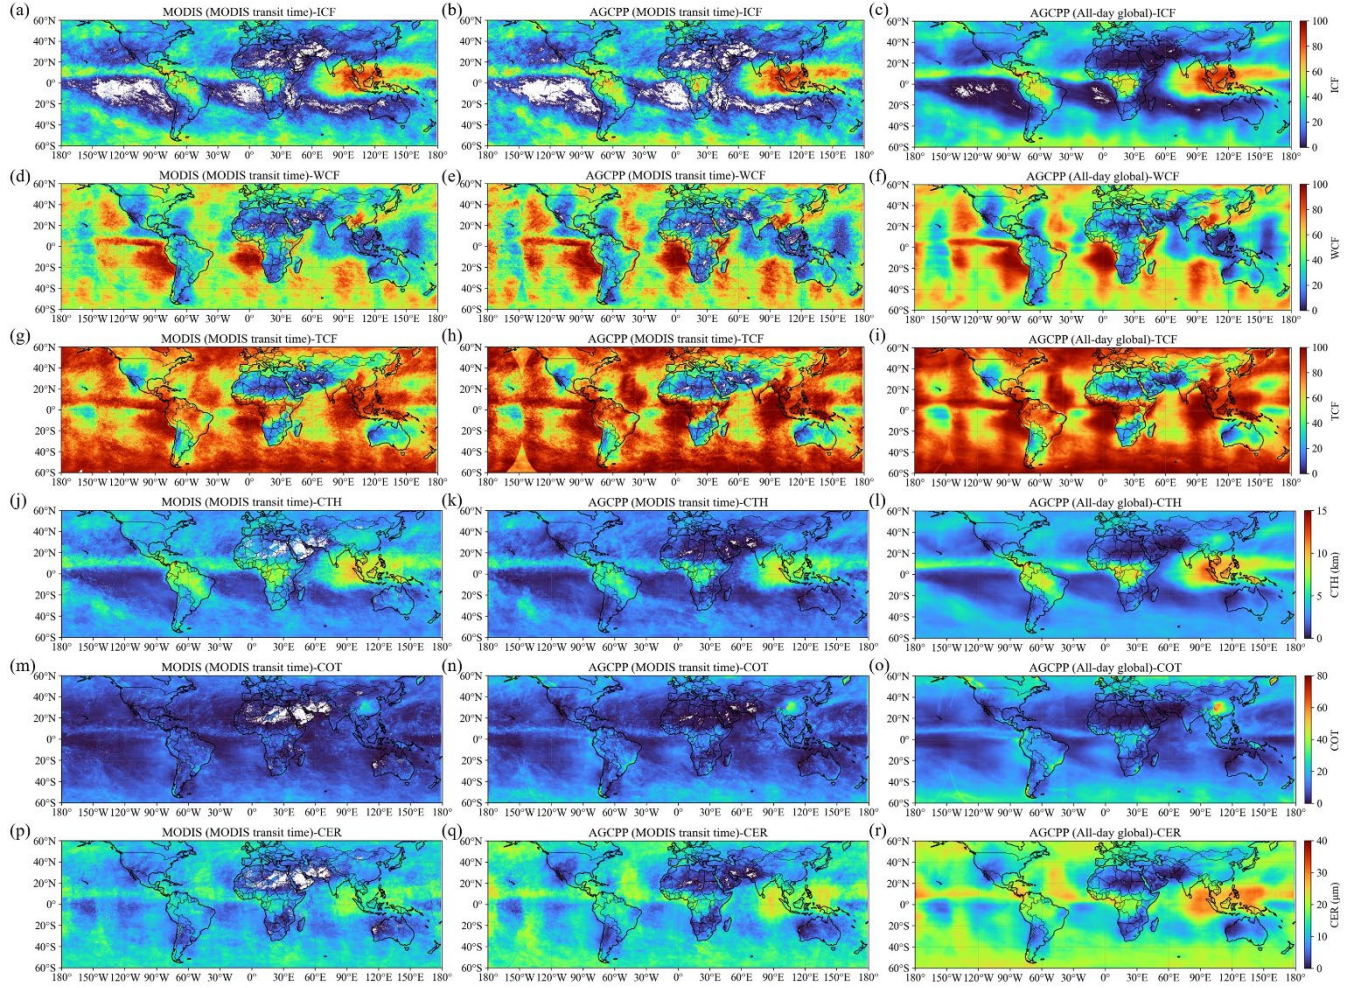

**45 Figure S 4.** The spatial distribution of global cloud physical products for the SON season average from 2020 to 2022, respectively: ICF (a–c), WCF (d–f), TCF (g–i), CTH (j–l), COT (m–o), and CER (p–r). Vertically, these are the seasonal averages of the MODIS official cloud products with a 1.5 h transit time interval (a, d, g, j, m, p), the seasonal averages of AGCPP at the same MODIS transit time and coverage location (b, e, h, k, n, q), and the seasonal averages of AGCPP's all -day global products at all times (c, f, i, l, o, r).
